# Supplementary material
Source: PubMed Central journal article supplement (PMC9768045)
Supplement: 11357_2022_681_MOESM1_ESM.pdf [file 11357_2022_681_MOESM1_ESM.pdf]

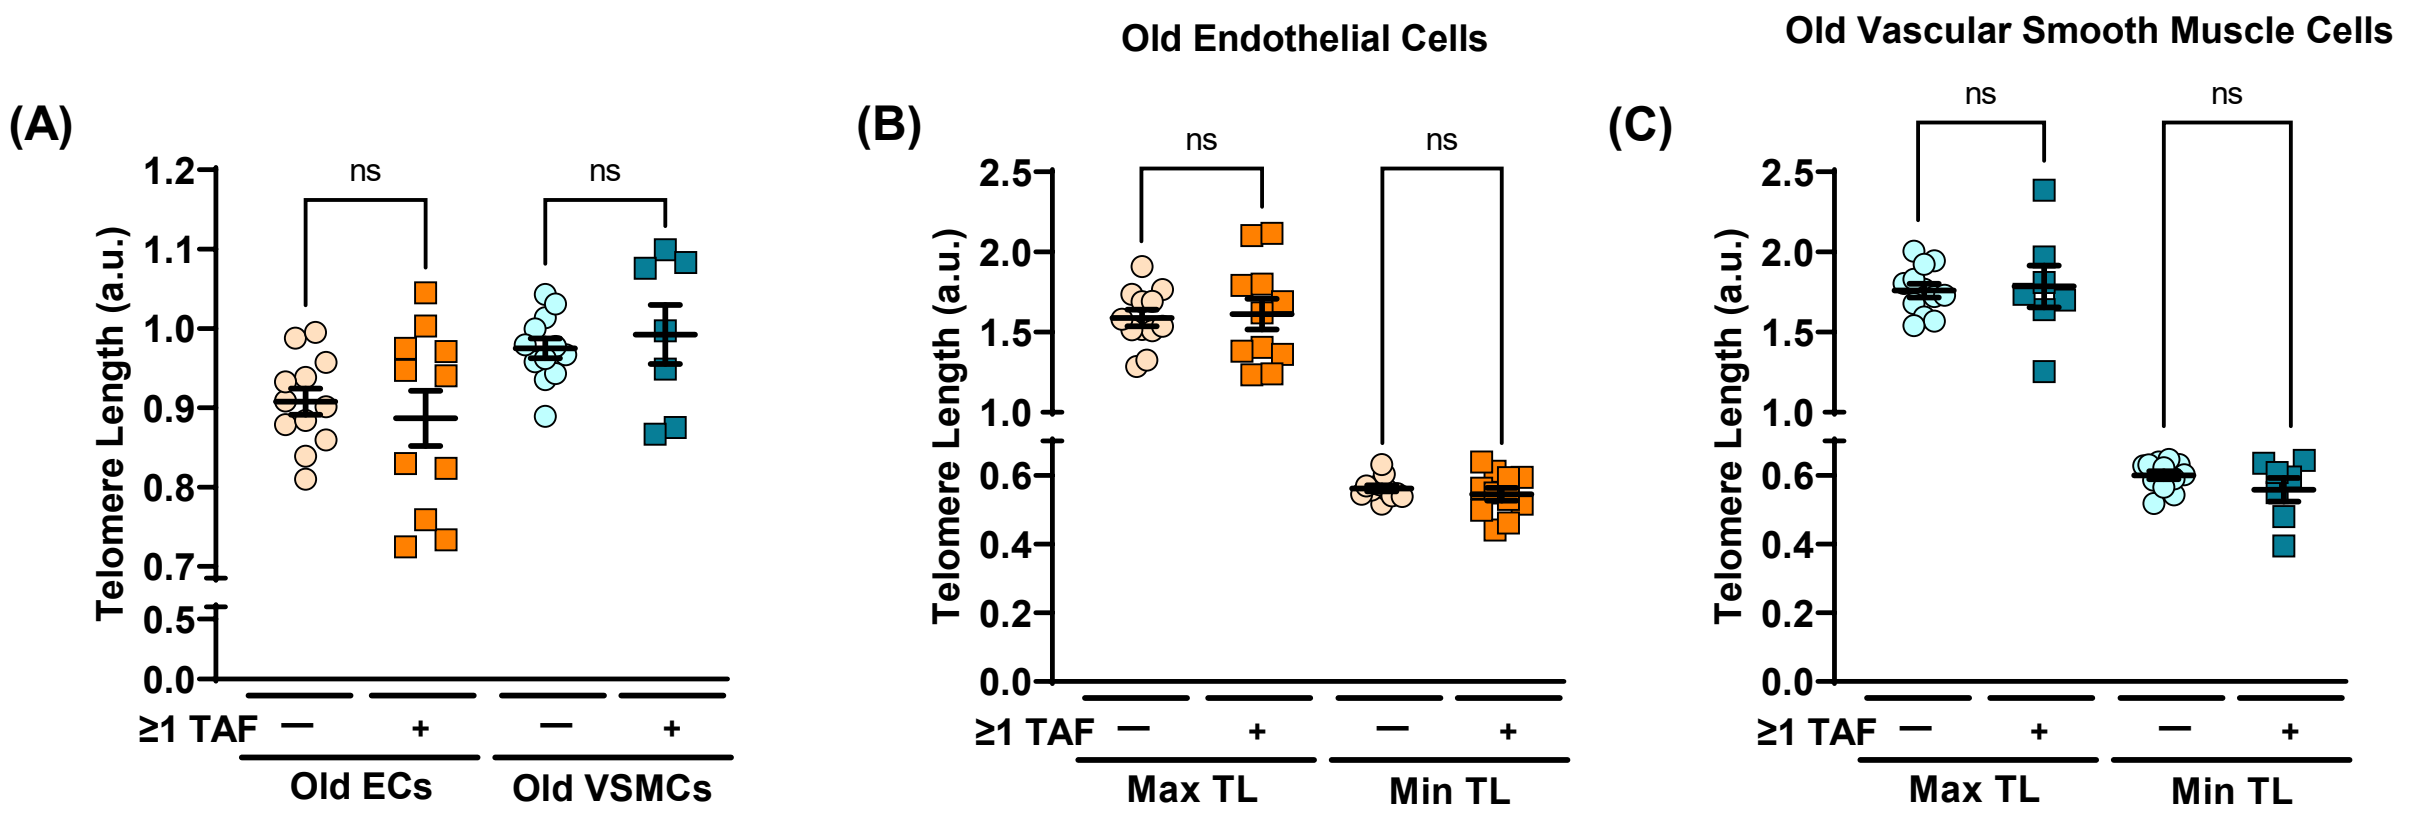

**Supplementary Figure 1. Influence of telomere length on telomere dysfunction in aortic endothelial cells (ECs) and vascular smooth muscle cells (VSMCs).** (A) Mean telomere length in ECs and VSMCs from old mice with and without (W/O) one or more telomere-associated DDR foci (TAF). (B) Maximum and minimum telomere length in ECs from old mice with and without (W/O) one or more telomere-associated DDR foci (TAF). (C) Maximum and minimum telomere length in VSMCs from old mice with and without (W/O) one or more telomere-associated DDR foci (TAF). N = 11 / 12 per group. Data are mean  $\pm$  SEM.

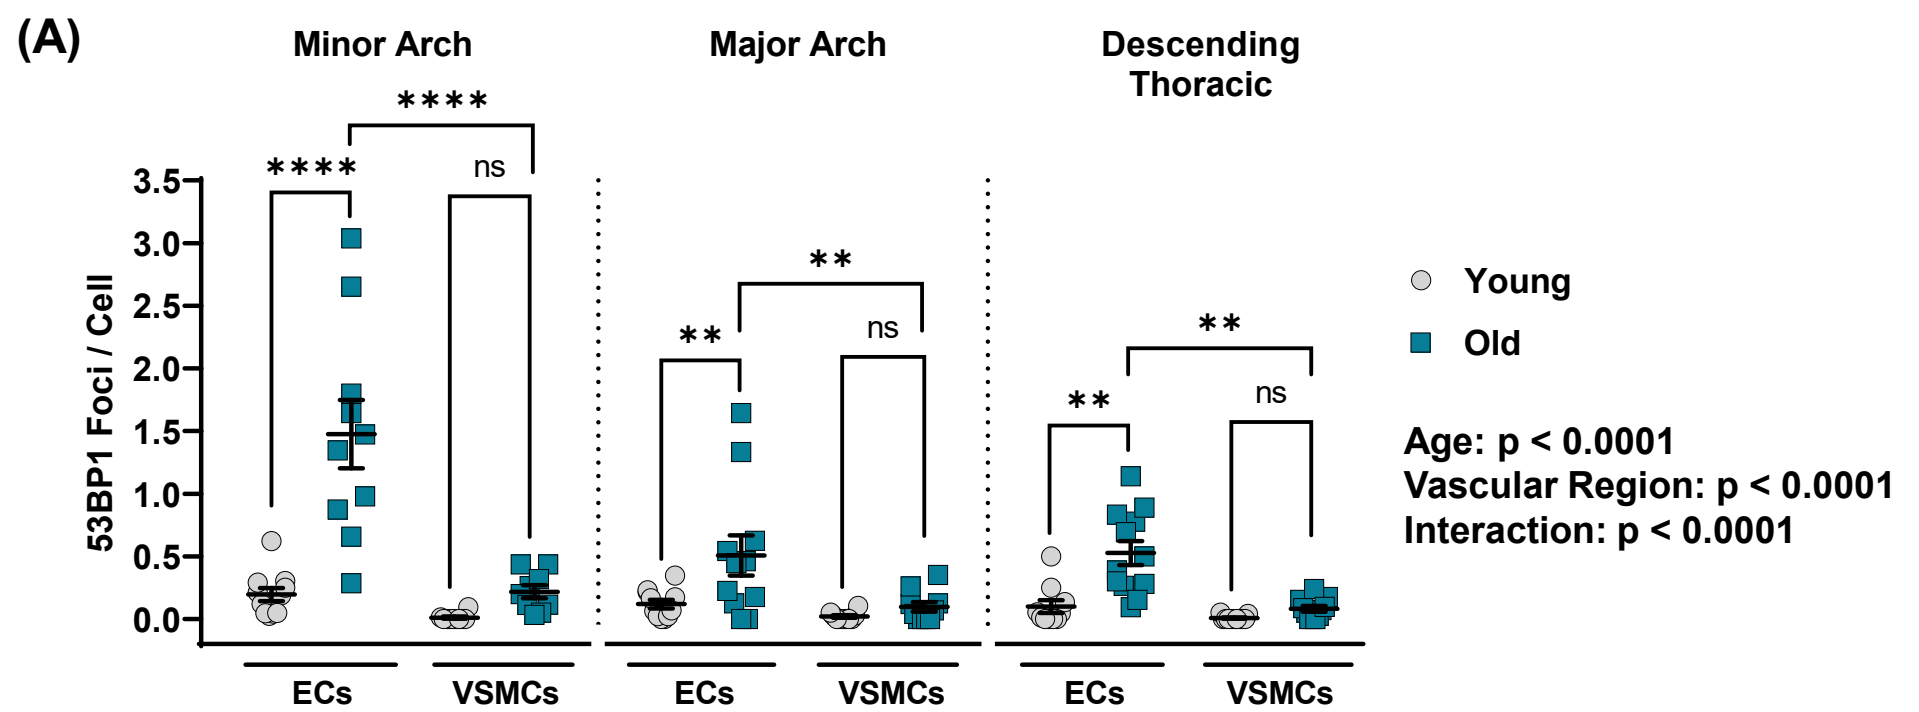

**Supplementary Figure 2. Effect of aging on double stranded DNA breaks in aortic endothelial cells (ECs) and vascular smooth muscle cells (VSMCs) at atheroprone and non-atheroprone regions. (A) Number of 53BP1 foci per EC and VSMC. N = 11 / 12 per group. Data are mean  $\pm$  SEM. \*\* $p < 0.01$ , \*\*\*\* $p < 0.0001$**

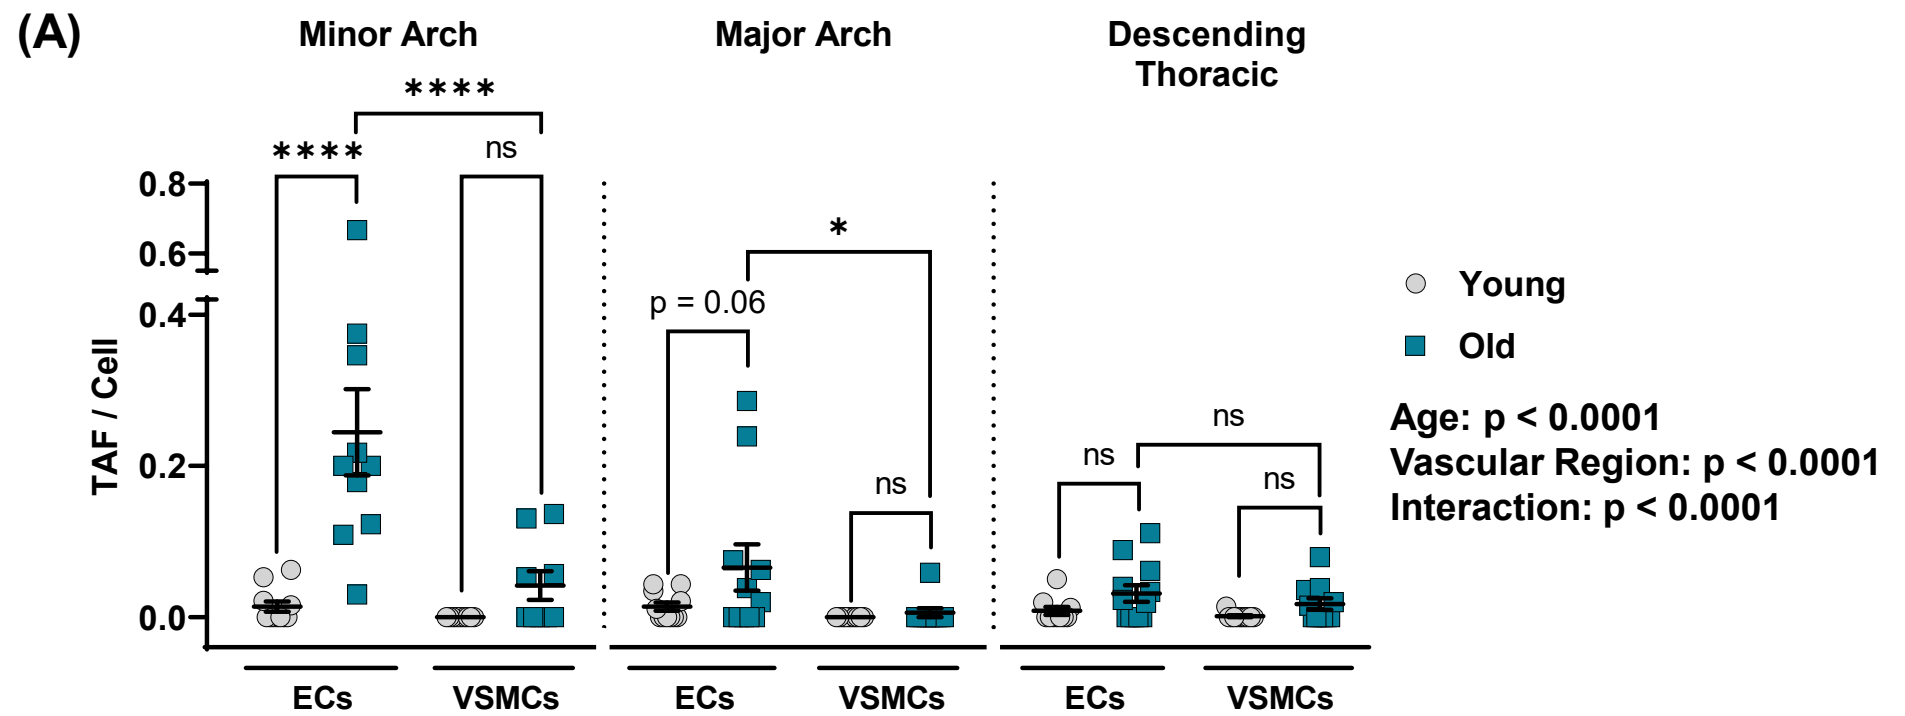

**Supplementary Figure 3. Effect of aging on telomere dysfunction in aortic endothelial cells (ECs) and vascular smooth muscle cells (VSMCs) at atheroprone and non-atheroprone regions.** (A) Number of telomere-associated DDR foci (TAF) per EC and VSMC. N = 9 – 12 per group. Data are mean  $\pm$  SEM. \* $p < 0.05$ , \*\*\*\* $p < 0.0001$

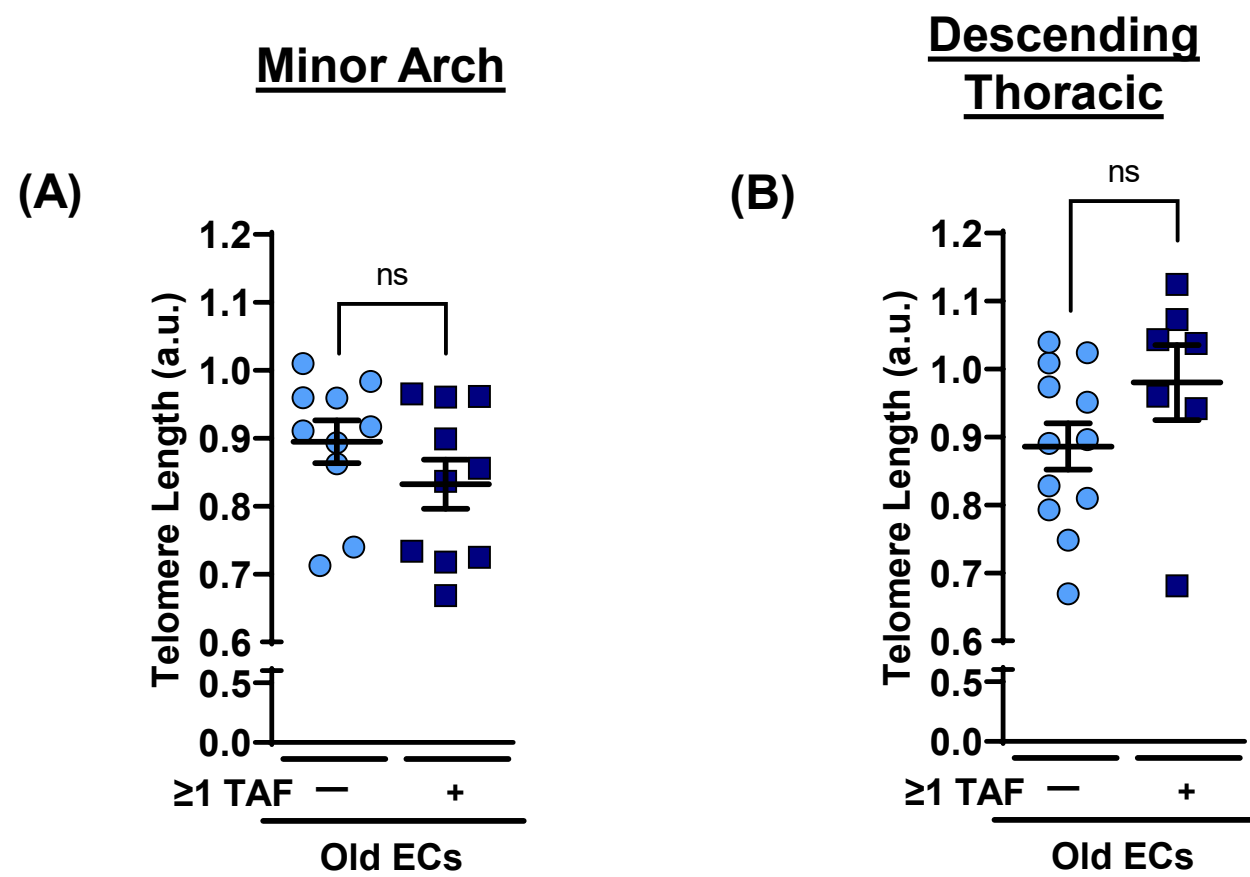

**Supplementary Figure 4. Influence of telomere length on telomere dysfunction in aortic endothelial cells (ECs) at atheroprone and non-atheroprone region.** (A) Mean telomere length in ECs from minor arch of old mice with and without (W/O) one or more telomere-associated DDR foci (TAF). (B) Mean telomere length in ECs from descending thoracic aorta of old mice with and without (W/O) one or more telomere-associated DDR foci (TAF). N = 7 – 12 per group. Data are mean  $\pm$  SEM.

## Major Arch

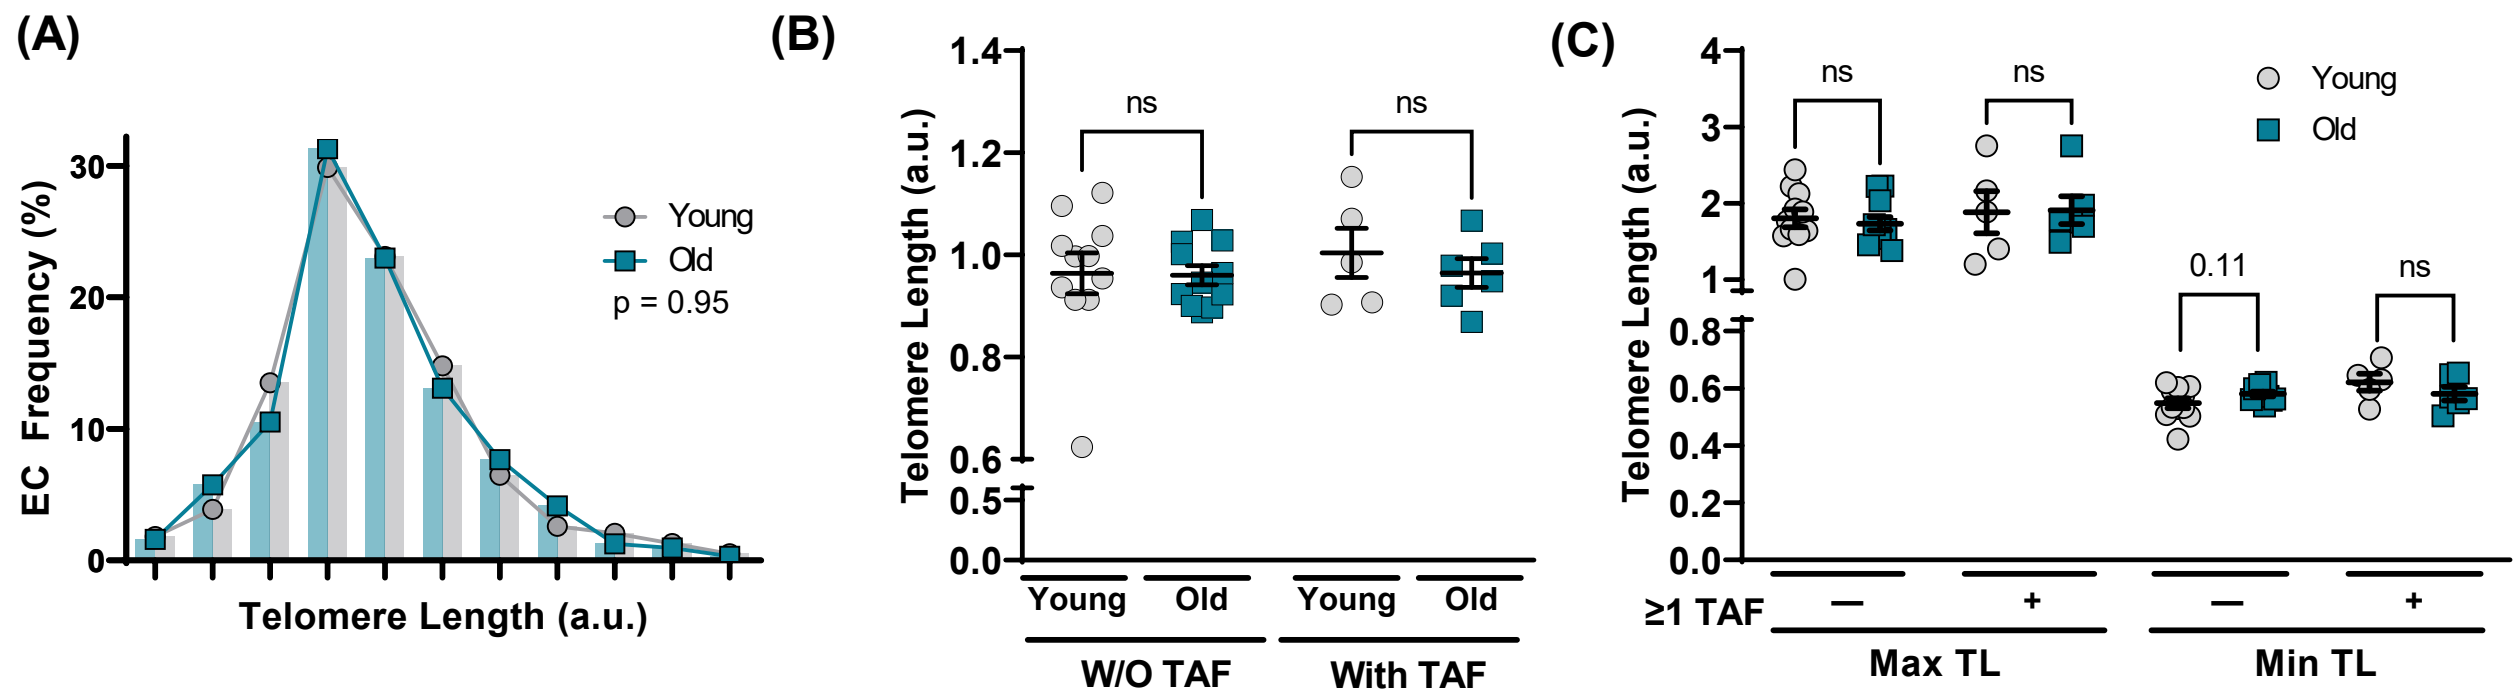

**Supplementary Figure 5. Influence of telomere length on telomere dysfunction in aortic endothelial cells (ECs) at aortic major arch.** (A) Frequency distribution of ECs from major arch based on mean telomere length. N=11 per group (B) Mean telomere length in ECs from major arch with and without (W/O) one or more telomere-associated DDR foci (TAF). N = 5 – 11 per group (C) Maximum and minimum telomere length in ECs from major arch with and without (W/O) one or more telomere-associated DDR foci (TAF). N = 5 – 11 per group. Data are mean  $\pm$  SEM.
